# Supplementary material for: Characterization of the Metabolic Profile of Olive Tissues (Roots, Stems and Leaves): Relationship with Cultivars’ Resistance/Susceptibility to the Soil Fungus Verticillium dahliae
Source: MDPI journal article supplement (doi:10.3390/antiox12122120), 2023-12-15
Supplement: s1 [file s1]

## Supplementary Material

### Characterization of the Metabolic Profile of Olive Tissues (Roots, Stems and Leaves): Relationship with Cultivars' Resistance/Susceptibility to the Soil Fungus *Verticillium dahliae*

Irene Serrano-García<sup>1</sup>, Lucía Olmo-García<sup>1</sup>, Olga Monago-Maraña<sup>2</sup>, Iván Muñoz Cabello de Alba<sup>1</sup>, Lorenzo León<sup>3</sup>, Raúl de la Rosa<sup>3</sup>, Alicia Serrano<sup>4</sup>, Ana María Gómez-Caravaca<sup>1</sup>, Alegría Carrasco-Pancorbo<sup>1</sup>

<sup>1</sup>Department of Analytical Chemistry, Faculty of Sciences, University of Granada. Ave. Fuentenueva s/n, E-18071 Granada, Spain.

<sup>2</sup>Department of Analytical Sciences, Faculty of Sciences, Universidad Nacional de Educación a Distancia (UNED), Avda. Esparta s/n, Crta. de Las Rozas-Madrid, E-28232 Madrid, Spain.

<sup>3</sup>Instituto de Investigación y Formación Agraria y Pesquera (IFAPA), Centro Alameda del Obispo, Ave. Menéndez Pidal s/n, E-14004, Córdoba, Spain.

<sup>4</sup>Department of Experimental Biology. The University Institute of Research on Olive and Olive Oils (INUO). University of Jaén. Campus Las Lagunillas s/n, 23071 Jaén, Spain.

#### Index:

Table S1. Analytical parameters of the LC-IT MS method. (pag 2)

Table S2. Quantitative results obtained by LC-IT MS. Data expressed as mg kg<sup>-1</sup> of olive tissue (DW) ± standard deviation (leaves, a; stems, b; roots, c). (pag 3)

Figure S1. Principal component analysis (PCA) loadings plots representing the two principal components (PCs) showing the best samples' grouping for each olive tissue: leaves (A), stems (B) and roots (C). (pag 6)

Figure S2. Representation of the regression coefficients and variable importance on the projection (VIP) values of each metabolite quantified in the three olive tissues under study: leaves (A), stems (B) and roots (C). (pag 7)

Compound numbers in Figures S1 and S2. (pag 8)

**Table S1.** Analytical parameters of the LC-IT MS method.

| Compound               | Calibration curve         | R <sup>2</sup> | Dynamic linear range / mg l <sup>-1</sup> | LOD <sup>a</sup> / µg l <sup>-1</sup> | LOQ <sup>a</sup> / µg l <sup>-1</sup> | Intra-day repeatability <sup>b</sup> (area RSD / %) | Inter-day repeatability <sup>c</sup> (area RSD / %) |
|------------------------|---------------------------|----------------|-------------------------------------------|---------------------------------------|---------------------------------------|-----------------------------------------------------|-----------------------------------------------------|
| Quinic acid            | y = 6212.5 + 36428.1x     | 0.9983         | LOQ – 18.7                                | 24.4                                  | 81.3                                  | 0.33                                                | 0.49                                                |
|                        | y = 512246.7 + 17005.7x   | 0.9948         | 18.7 – 150.0                              |                                       |                                       |                                                     |                                                     |
| Hydroxytyrosol         | y = 8449.0 + 31061.1x     | 0.9976         | LOQ – 52.0                                | 47.3                                  | 157.6                                 | 7.08                                                | 10.62                                               |
| Tyrosol                | y = -583.7 + 10334.9x     | 0.9997         | LOQ – 25.0                                | 171.3                                 | 571.0                                 | 5.70                                                | 8.56                                                |
|                        | y = 107822.0 + 6833.5x    | 0.9898         | 25.0 – 100.0                              |                                       |                                       |                                                     |                                                     |
| Rutin                  | y = -36097.3 + 169422.6x  | 0.9992         | LOQ – 12.0                                | 28.4                                  | 94.6                                  | 5.23                                                | 7.85                                                |
|                        | y = 1067657.8 + 107842.2x | 0.9911         | 12.0 – 96.0                               |                                       |                                       |                                                     |                                                     |
| Luteolin-7-O-glucoside | y = 56511.5 + 411020.5x   | 0.9966         | LOQ – 8.0                                 | 18.7                                  | 62.3                                  | 1.66                                                | 2.49                                                |
|                        | y = 2348016.3 + 193405.8x | 0.9924         | 8.0 – 64.0                                |                                       |                                       |                                                     |                                                     |
| Verbascoside           | y = 53328.5 + 111178.1x   | 0.9955         | LOQ – 52                                  | 42.1                                  | 140.2                                 | 3.63                                                | 5.44                                                |
| Oleuropein             | y = 514056.1 + 183004.9x  | 0.9942         | LOQ – 62.5                                | 25.4                                  | 84.6                                  | 2.25                                                | 3.37                                                |
|                        | y = 10361638.0 + 48313.3x | 0.9954         | 62.5 – 500.0                              |                                       |                                       |                                                     |                                                     |
| Maslinic acid          | y = 166450.8 + 197117.1x  | 0.9899         | LOQ – 12.5                                | 14.9                                  | 49.5                                  | 3.59                                                | 5.38                                                |
|                        | y = 2244039.3 + 54184.3x  | 0.9933         | 12.5 – 100.0                              |                                       |                                       |                                                     |                                                     |
| Betulinic acid         | y = 70030.7 + 930415.0x   | 0.9916         | LOQ – 2.5                                 | 2.0                                   | 6.7                                   | 1.36                                                | 2.05                                                |
|                        | y = 1436593.5 + 396367.1x | 0.9902         | 2.5 – 10.0                                |                                       |                                       |                                                     |                                                     |
| Oleanolic acid         | y = 251665.6 + 430573.6x  | 0.9913         | LOQ – 9.0                                 | 5.8                                   | 19.2                                  | 1.96                                                | 2.94                                                |
|                        | y = 2409833.3 + 151759.4x | 0.9949         | 9.0 – 72.0                                |                                       |                                       |                                                     |                                                     |

<sup>a</sup> Calculated as the concentration that generates a signal to noise ratio equal to 3 (LOD) and 10 (LOQ).

<sup>b</sup> RSD (relative standard deviation) of peak area for 6 injections of the quality control sample carried out within the same sequence.

<sup>c</sup> RSD of peak area for 20 injections of the quality control sample from different sequences carried out over 3 days.

Abbreviations: LOD, Limit of detection; LOQ, Limit of quantification.

**Table S2.** Quantitative results obtained by LC-IT MS. Data expressed as mg kg<sup>-1</sup> of olive tissue (DW) ± standard deviation.

| <b>a) Leaves</b>                                                 | <b>Arbequina</b>          | <b>Empeltre</b>          | <b>Frantoio</b>          | <b>Hojiblanca</b>        | <b>Jabali</b>            | <b>Koroneiki</b>          | <b>Leccino</b>            | <b>Mastoidis</b>        | <b>Menya</b>               | <b>Picual</b>           |
|------------------------------------------------------------------|---------------------------|--------------------------|--------------------------|--------------------------|--------------------------|---------------------------|---------------------------|-------------------------|----------------------------|-------------------------|
| <i>Aldehydic form of decarboxymethyl elenolic acid glucoside</i> | 771±156 <sup>ab</sup>     | 741±132 <sup>ab</sup>    | 240±77 <sup>a</sup>      | 1095±670 <sup>abc</sup>  | 1891±374 <sup>c</sup>    | 957±558 <sup>abc</sup>    | 648±133 <sup>ab</sup>     | 438±35 <sup>ab</sup>    | 1274±411 <sup>bc</sup>     | 1239±287 <sup>abc</sup> |
| <i>Apigenin-7-O-glucoside</i>                                    | 138±21 <sup>a</sup>       | 193±34 <sup>a</sup>      | 234±80 <sup>a</sup>      | 250±198 <sup>a</sup>     | 422±82 <sup>a</sup>      | 80±43 <sup>a</sup>        | 1025±364 <sup>b</sup>     | 236±23 <sup>a</sup>     | 353±109 <sup>a</sup>       | 246±81 <sup>a</sup>     |
| <i>Apigenin-O-rutinoside</i>                                     | 436±61 <sup>ab</sup>      | 404±50 <sup>ab</sup>     | 270±76 <sup>ab</sup>     | 411±196 <sup>ab</sup>    | 564±165 <sup>bc</sup>    | 142±51 <sup>a</sup>       | 854±251 <sup>c</sup>      | 288±39 <sup>ab</sup>    | 445±113 <sup>ab</sup>      | 328±58 <sup>ab</sup>    |
| <i>Betulinic acid</i>                                            | 113±33 <sup>ab</sup>      | 234±19 <sup>b</sup>      | 165±25 <sup>ab</sup>     | 151±77 <sup>ab</sup>     | 149±57 <sup>ab</sup>     | 118±57 <sup>ab</sup>      | 181±49 <sup>ab</sup>      | 197±20 <sup>ab</sup>    | 96±31 <sup>a</sup>         | 137±56 <sup>ab</sup>    |
| <i>Chrysoeriol-O-glucoside</i>                                   | 82±20 <sup>a</sup>        | 209±54 <sup>a</sup>      | 205±85 <sup>a</sup>      | 81±59 <sup>a</sup>       | 173±30 <sup>a</sup>      | 129±85 <sup>a</sup>       | 117±51 <sup>a</sup>       | 167±17 <sup>a</sup>     | 65±9 <sup>a</sup>          | 103±35 <sup>a</sup>     |
| <i>Demethyl oleuropein</i>                                       | 510±182 <sup>a</sup>      | 1053±69 <sup>ab</sup>    | 826±329 <sup>ab</sup>    | 445±270 <sup>a</sup>     | 2021±1240 <sup>b</sup>   | 591±217 <sup>a</sup>      | 316±127 <sup>a</sup>      | 598±101 <sup>a</sup>    | 329±201 <sup>a</sup>       | 587±472 <sup>a</sup>    |
| <i>Diosmin</i>                                                   | 222±84 <sup>a</sup>       | 682±195 <sup>b</sup>     | 114±34 <sup>a</sup>      | 127±127 <sup>a</sup>     | 308±105 <sup>a</sup>     | 231±123 <sup>a</sup>      | 147±83 <sup>a</sup>       | 259±79 <sup>a</sup>     | 57±21 <sup>a</sup>         | 133±50 <sup>a</sup>     |
| <i>Elenolic acid glucoside (isomer 1)</i>                        | 506±67 <sup>a</sup>       | 358±30 <sup>a</sup>      | 334±127 <sup>a</sup>     | 297±112 <sup>a</sup>     | 510±120 <sup>a</sup>     | 464±306 <sup>a</sup>      | 398±157 <sup>a</sup>      | 680±111 <sup>a</sup>    | 596±147 <sup>a</sup>       | 314±48 <sup>a</sup>     |
| <i>Elenolic acid glucoside (isomer 2)</i>                        | 227±9 <sup>a</sup>        | 303±71 <sup>a</sup>      | 158±54 <sup>a</sup>      | 338±191 <sup>a</sup>     | 609±49 <sup>abc</sup>    | 904±478 <sup>bc</sup>     | 281±68 <sup>a</sup>       | 1035±182 <sup>c</sup>   | 381±103 <sup>ab</sup>      | 485±176 <sup>ab</sup>   |
| <i>Gallocatechin</i>                                             | 46±13 <sup>a</sup>        | 48±6 <sup>ab</sup>       | 30±9 <sup>a</sup>        | 59±19 <sup>ab</sup>      | 29±7 <sup>a</sup>        | 40±16 <sup>a</sup>        | 37±5 <sup>a</sup>         | 51±6 <sup>ab</sup>      | 59±9 <sup>ab</sup>         | 80±14 <sup>b</sup>      |
| <i>Hydroxytyrosol</i>                                            | 577±107 <sup>ab</sup>     | 725±38 <sup>ab</sup>     | 726±243 <sup>ab</sup>    | 354±123 <sup>a</sup>     | 714±61 <sup>ab</sup>     | 585±304 <sup>ab</sup>     | 786±134 <sup>ab</sup>     | 880±54 <sup>b</sup>     | 479±132 <sup>ab</sup>      | 492±156 <sup>ab</sup>   |
| <i>Hydroxytyrosol glucoside</i>                                  | 1241±141 <sup>ab</sup>    | 1347±254 <sup>ab</sup>   | 450±102 <sup>a</sup>     | 649±509 <sup>ab</sup>    | 3678±1037 <sup>c</sup>   | 2872±2071 <sup>bc</sup>   | 1760±563 <sup>abc</sup>   | 2845±114 <sup>bc</sup>  | 1209±434 <sup>ab</sup>     | 811±187 <sup>ab</sup>   |
| <i>Ligstroside</i>                                               | 3991±728 <sup>ab</sup>    | 8608±1434 <sup>c</sup>   | 2085±808 <sup>a</sup>    | 2136±368 <sup>a</sup>    | 3320±920 <sup>ab</sup>   | 3393±2351 <sup>ab</sup>   | 3732±1531 <sup>ab</sup>   | 6372±1012 <sup>bc</sup> | 3507±1139 <sup>ab</sup>    | 2292±959 <sup>a</sup>   |
| <i>Lucidumoside C</i>                                            | 89±16 <sup>a</sup>        | 100±14 <sup>a</sup>      | 177±57 <sup>abc</sup>    | 88±37 <sup>a</sup>       | 212±92 <sup>abc</sup>    | 116±54 <sup>ab</sup>      | 110±38 <sup>a</sup>       | 264±62 <sup>c</sup>     | 253±14 <sup>bc</sup>       | 107±41 <sup>a</sup>     |
| <i>Luteolin-7-O-glucoside (isomer 1)</i>                         | 1263±353 <sup>ab</sup>    | 1726±427 <sup>ab</sup>   | 1430±677 <sup>ab</sup>   | 720±660 <sup>a</sup>     | 2674±432 <sup>b</sup>    | 1175±899 <sup>ab</sup>    | 768±414 <sup>a</sup>      | 1347±128 <sup>ab</sup>  | 586±464 <sup>a</sup>       | 1265±498 <sup>ab</sup>  |
| <i>Luteolin-O-glucoside (isomer 2)</i>                           | 403±145 <sup>a</sup>      | 530±175 <sup>a</sup>     | 375±181 <sup>a</sup>     | 411±356 <sup>a</sup>     | 508±71 <sup>a</sup>      | 454±343 <sup>a</sup>      | 129±61 <sup>a</sup>       | 447±34 <sup>a</sup>     | 183±35 <sup>a</sup>        | 450±197 <sup>a</sup>    |
| <i>Luteolin-O-glucoside (isomer 3)</i>                           | 86±17 <sup>ab</sup>       | 144±45 <sup>ab</sup>     | 59±18 <sup>a</sup>       | 62±45 <sup>a</sup>       | 94±26 <sup>ab</sup>      | 145±87 <sup>ab</sup>      | 39±18 <sup>a</sup>        | 189±23 <sup>b</sup>     | 83±23 <sup>ab</sup>        | 111±38 <sup>ab</sup>    |
| <i>Maslinic acid</i>                                             | 1274±254 <sup>a</sup>     | 4768±186 <sup>c</sup>    | 3368±288 <sup>bc</sup>   | 2039±984 <sup>ab</sup>   | 3292±925 <sup>bc</sup>   | 2047±892 <sup>ab</sup>    | 2342±784 <sup>ab</sup>    | 3430±26 <sup>bc</sup>   | 1580±539 <sup>ab</sup>     | 2559±908 <sup>ab</sup>  |
| <i>Neonuzhenide/oleuropein glucoside (isomer 1)</i>              | 48±19 <sup>a</sup>        | 58±5 <sup>a</sup>        | 29±10 <sup>a</sup>       | 72±51 <sup>a</sup>       | 174±83 <sup>a</sup>      | 177±148 <sup>a</sup>      | 180±112 <sup>a</sup>      | 62±11 <sup>a</sup>      | 615±405 <sup>a</sup>       | 57±19 <sup>a</sup>      |
| <i>Neonuzhenide/oleuropein glucoside (isomer 3)</i>              | 416±56 <sup>ab</sup>      | 501±29 <sup>ab</sup>     | 228±84 <sup>a</sup>      | 272±178 <sup>a</sup>     | 686±122 <sup>bc</sup>    | 438±240 <sup>ab</sup>     | 489±159 <sup>ab</sup>     | 899±88 <sup>c</sup>     | 407±152 <sup>ab</sup>      | 393±114 <sup>ab</sup>   |
| <i>Neonuzhenide/oleuropein glucoside (isomer 4)</i>              | 163±44 <sup>a</sup>       | 157±15 <sup>a</sup>      | 520±204 <sup>b</sup>     | 191±83 <sup>a</sup>      | 106±21 <sup>a</sup>      | 75±35 <sup>a</sup>        | 257±100 <sup>ab</sup>     | 242±26 <sup>a</sup>     | 214±120 <sup>a</sup>       | 245±113 <sup>a</sup>    |
| <i>Oleanolic acid</i>                                            | 10152±2241 <sup>a</sup>   | 15255±632 <sup>a</sup>   | 15670±1969 <sup>a</sup>  | 13431±5751 <sup>a</sup>  | 11844±2796 <sup>a</sup>  | 10749±4897 <sup>a</sup>   | 15636±3204 <sup>a</sup>   | 14196±504 <sup>a</sup>  | 12239±3635 <sup>a</sup>    | 14957±3449 <sup>a</sup> |
| <i>Oleoside/secologanoside (isomer 1)</i>                        | 626±95 <sup>abc</sup>     | 1095±135 <sup>d</sup>    | 382±108 <sup>a</sup>     | 566±151 <sup>abc</sup>   | 682±55 <sup>abc</sup>    | 625±179 <sup>abc</sup>    | 673±55 <sup>abc</sup>     | 893±52 <sup>cd</sup>    | 818±198 <sup>bcd</sup>     | 523±138 <sup>ab</sup>   |
| <i>Oleoside/secologanoside (isomer 2)</i>                        | 1666±402 <sup>ab</sup>    | 3515±316 <sup>c</sup>    | 1005±360 <sup>a</sup>    | 1465±781 <sup>ab</sup>   | 2347±313 <sup>abc</sup>  | 1502±702 <sup>ab</sup>    | 1990±229 <sup>ab</sup>    | 1551±28 <sup>ab</sup>   | 2580±942 <sup>bc</sup>     | 1541±101 <sup>ab</sup>  |
| <i>Oleuropein</i>                                                | 49364±4286 <sup>abc</sup> | 70692±5619 <sup>bc</sup> | 28663±12486 <sup>a</sup> | 31231±10647 <sup>a</sup> | 40919±6365 <sup>ab</sup> | 42112±21892 <sup>ab</sup> | 46581±7692 <sup>abc</sup> | 74453±5306 <sup>c</sup> | 50140±13178 <sup>abc</sup> | 29239±9434 <sup>a</sup> |
| <i>Oleuropein aglycone (isomer 1)</i>                            | 203±83 <sup>a</sup>       | 640±160 <sup>b</sup>     | 263±41 <sup>a</sup>      | 124±47 <sup>a</sup>      | 124±71 <sup>a</sup>      | 101±61 <sup>a</sup>       | 190±86 <sup>a</sup>       | 572±205 <sup>b</sup>    | 74±12 <sup>a</sup>         | 164±86 <sup>a</sup>     |
| <i>Oleuropein aglycone (isomer 2)</i>                            | 95±12 <sup>ab</sup>       | 391±59 <sup>d</sup>      | 325±50 <sup>cd</sup>     | 130±62 <sup>abc</sup>    | 78±32 <sup>a</sup>       | 99±59 <sup>ab</sup>       | 280±132 <sup>bcd</sup>    | 317±123 <sup>cd</sup>   | 71±20 <sup>a</sup>         | 104±9 <sup>ab</sup>     |
| <i>Oleurosides</i>                                               | 2147±277 <sup>bc</sup>    | 2567±106 <sup>c</sup>    | 999±477 <sup>a</sup>     | 1102±426 <sup>ab</sup>   | 1928±214 <sup>abc</sup>  | 1093±561 <sup>ab</sup>    | 1666±476 <sup>abc</sup>   | 4349±403 <sup>d</sup>   | 1469±458 <sup>abc</sup>    | 1309±327 <sup>ab</sup>  |
| <i>Quinic acid</i>                                               | 5802±590 <sup>abc</sup>   | 7815±328 <sup>c</sup>    | 6357±1190 <sup>abc</sup> | 4992±1146 <sup>ab</sup>  | 5916±463 <sup>abc</sup>  | 5826±1589 <sup>abc</sup>  | 7229±1019 <sup>bc</sup>   | 5549±350 <sup>abc</sup> | 4769±251 <sup>ab</sup>     | 4439±574 <sup>a</sup>   |
| <i>Rutin</i>                                                     | 287±132 <sup>a</sup>      | 578±159 <sup>a</sup>     | 166±25 <sup>a</sup>      | 145±130 <sup>a</sup>     | 461±144 <sup>a</sup>     | 493±368 <sup>a</sup>      | 142±52 <sup>a</sup>       | 368±60 <sup>a</sup>     | 188±70 <sup>a</sup>        | 240±162 <sup>a</sup>    |
| <i>Unknown 1</i>                                                 | 120±60 <sup>a</sup>       | 42±14 <sup>a</sup>       | 29±7 <sup>a</sup>        | 56±10 <sup>a</sup>       | 107±46 <sup>a</sup>      | 260±242 <sup>a</sup>      | 81±58 <sup>a</sup>        | 265±43 <sup>a</sup>     | 113±51 <sup>a</sup>        | 24±15 <sup>a</sup>      |
| <i>Unknown 2</i>                                                 | 423±39 <sup>ab</sup>      | 258±47 <sup>a</sup>      | 440±59 <sup>ab</sup>     | 488±127 <sup>b</sup>     | 402±64 <sup>ab</sup>     | 409±99 <sup>ab</sup>      | 351±70 <sup>ab</sup>      | 461±80 <sup>ab</sup>    | 545±66 <sup>b</sup>        | 458±80 <sup>ab</sup>    |
| <i>Unknown 5</i>                                                 | 763±155 <sup>ab</sup>     | 958±39 <sup>b</sup>      | 813±218 <sup>ab</sup>    | 588±248 <sup>ab</sup>    | 386±97 <sup>a</sup>      | 546±200 <sup>ab</sup>     | 935±279 <sup>b</sup>      | 823±46 <sup>ab</sup>    | 585±170 <sup>ab</sup>      | 569±190 <sup>ab</sup>   |
| <i>Verbascoside</i>                                              | 2638±1403 <sup>a</sup>    | 12863±4150 <sup>b</sup>  | 1204±221 <sup>a</sup>    | 3506±3379 <sup>a</sup>   | 3025±853 <sup>a</sup>    | 3676±2519 <sup>a</sup>    | 4118±1928 <sup>a</sup>    | 2137±1623 <sup>a</sup>  | 706±316 <sup>a</sup>       | 2216±1177 <sup>a</sup>  |

Lower case letters indicate Tukey's post hoc test differences ( $p < 0.05$ ) among different cultivars. Means with a common letter are not significantly different ( $p > 0.05$ )

**Table S2.** Quantitative results obtained by LC-IT MS. Data expressed as mg kg<sup>-1</sup> of olive tissue (DW) ± standard deviation (*cont.*).

| <b>b) Stems</b>                                           | <b>Arbequina</b>        | <b>Empeltre</b>         | <b>Frantoio</b>           | <b>Hojiblanca</b>        | <b>Jabali</b>             | <b>Koroneiki</b>          | <b>Leccino</b>           | <b>Mastoidis</b>         | <b>Menya</b>              | <b>Picual</b>             |
|-----------------------------------------------------------|-------------------------|-------------------------|---------------------------|--------------------------|---------------------------|---------------------------|--------------------------|--------------------------|---------------------------|---------------------------|
| 11-Hydroxyiridodial glucoside pentaacetate                | 15±3 <sup>a</sup>       | 81±23 <sup>bcd</sup>    | 36±4 <sup>ab</sup>        | 27±4 <sup>ab</sup>       | 18±5 <sup>a</sup>         | 94±20 <sup>cd</sup>       | 105±47 <sup>d</sup>      | 7±1 <sup>a</sup>         | 51±17 <sup>abc</sup>      | 22±8 <sup>a</sup>         |
| Acetoxypinoresinol                                        | 112±26 <sup>bcd</sup>   | 143±57 <sup>d</sup>     | 70±27 <sup>abc</sup>      | 96±17 <sup>abcd</sup>    | 44±8 <sup>ab</sup>        | 50±8 <sup>abc</sup>       | 57±4 <sup>abc</sup>      | 69±14 <sup>abc</sup>     | 116±25 <sup>cd</sup>      | 31±6 <sup>a</sup>         |
| Acetoxypinoresinol glucoside                              | 1052±133 <sup>bc</sup>  | 1172±189 <sup>cd</sup>  | 613±118 <sup>ab</sup>     | 996±179 <sup>abc</sup>   | 779±207 <sup>abc</sup>    | 1102±131 <sup>bcd</sup>   | 637±24 <sup>ab</sup>     | 1268±85 <sup>cd</sup>    | 1588±365 <sup>d</sup>     | 494±80 <sup>a</sup>       |
| Aldehydic form of decarboxymethyl elenolic acid glucoside | 286±9 <sup>a</sup>      | 397±11 <sup>ab</sup>    | 220±54 <sup>a</sup>       | 678±66 <sup>c</sup>      | 1114±236 <sup>d</sup>     | 747±11 <sup>c</sup>       | 168±30 <sup>a</sup>      | 245±18 <sup>a</sup>      | 294±36 <sup>a</sup>       | 640±126 <sup>bc</sup>     |
| Betulinic acid                                            | 76±18 <sup>ab</sup>     | 128±15 <sup>abc</sup>   | 176±52 <sup>cd</sup>      | 133±28 <sup>bc</sup>     | 211±29 <sup>d</sup>       | 222±19 <sup>d</sup>       | 58±16 <sup>a</sup>       | 184±10 <sup>cd</sup>     | 118±23 <sup>abc</sup>     | 81±15 <sup>ab</sup>       |
| Cyanidin-O-glucoside                                      | 18±3 <sup>a</sup>       | 23±6 <sup>a</sup>       | 16±3 <sup>a</sup>         | 101±15 <sup>b</sup>      | 88±33 <sup>b</sup>        | 13±1 <sup>a</sup>         | 92±38 <sup>b</sup>       | 16±1 <sup>a</sup>        | 6±2 <sup>a</sup>          | 76±6 <sup>b</sup>         |
| Cycloolivil                                               | 80±7 <sup>ab</sup>      | 137±21 <sup>ab</sup>    | 273±171 <sup>ab</sup>     | 74±16 <sup>a</sup>       | 101±4 <sup>ab</sup>       | 108±9 <sup>ab</sup>       | 296±148 <sup>b</sup>     | 81±19 <sup>ab</sup>      | 173±61 <sup>ab</sup>      | 87±13 <sup>ab</sup>       |
| Demethyl oleuropein                                       | 42±10 <sup>abc</sup>    | 128±38 <sup>d</sup>     | 76±23 <sup>abcd</sup>     | 32±9 <sup>ab</sup>       | 96±17 <sup>cd</sup>       | 70±15 <sup>abcd</sup>     | 93±40 <sup>bcd</sup>     | 37±5 <sup>abc</sup>      | 87±13 <sup>abcd</sup>     | 28±4 <sup>a</sup>         |
| Dihydrokaempferol                                         | 163±10 <sup>bc</sup>    | 116±21 <sup>b</sup>     | 60±3 <sup>a</sup>         | 278±27 <sup>e</sup>      | 200±23 <sup>cd</sup>      | 59±7 <sup>a</sup>         | 188±31 <sup>cd</sup>     | 45±7 <sup>a</sup>        | 31±5 <sup>a</sup>         | 229±12 <sup>de</sup>      |
| Dihydroquercetin 3-O-glucoside                            | 62±12 <sup>ab</sup>     | 43±4 <sup>ab</sup>      | 84±32 <sup>abc</sup>      | 20±4 <sup>a</sup>        | 142±43 <sup>cd</sup>      | 103±3 <sup>bcd</sup>      | 177±56 <sup>d</sup>      | 76±4 <sup>abc</sup>      | 51±7 <sup>ab</sup>        | 76±21 <sup>abc</sup>      |
| Elenolic acid glucoside (isomer 1)                        | 308±22 <sup>a</sup>     | 555±74 <sup>b</sup>     | 328±55 <sup>a</sup>       | 383±20 <sup>ab</sup>     | 558±15 <sup>b</sup>       | 419±42 <sup>ab</sup>      | 427±143 <sup>ab</sup>    | 397±36 <sup>ab</sup>     | 481±93 <sup>ab</sup>      | 345±30 <sup>a</sup>       |
| Elenolic acid glucoside (isomer 2)                        | 81±11 <sup>a</sup>      | 182±48 <sup>abc</sup>   | 71±26 <sup>a</sup>        | 92±21 <sup>ab</sup>      | 278±31 <sup>cde</sup>     | 237±36 <sup>bcd</sup>     | 402±125 <sup>e</sup>     | 352±53 <sup>de</sup>     | 315±53 <sup>cde</sup>     | 196±33 <sup>abc</sup>     |
| Hydroxy oleuropein                                        | 126±42 <sup>ab</sup>    | 146±33 <sup>ab</sup>    | 94±42 <sup>a</sup>        | 158±31 <sup>ab</sup>     | 148±28 <sup>ab</sup>      | 133±67 <sup>ab</sup>      | 80±30 <sup>a</sup>       | 174±40 <sup>ab</sup>     | 221±62 <sup>b</sup>       | 119±18 <sup>ab</sup>      |
| Hydroxypinoresinol glucoside                              | 105±11 <sup>a</sup>     | 125±34 <sup>a</sup>     | 90±18 <sup>a</sup>        | 146±11 <sup>a</sup>      | 66±10 <sup>a</sup>        | 77±4 <sup>a</sup>         | 356±110 <sup>b</sup>     | 148±18 <sup>a</sup>      | 106±27 <sup>a</sup>       | 368±28 <sup>b</sup>       |
| Hydroxytyrosol glucoside                                  | 1273±222 <sup>bc</sup>  | 1472±278 <sup>c</sup>   | 767±32 <sup>ab</sup>      | 373±126 <sup>a</sup>     | 1545±428 <sup>c</sup>     | 1610±379 <sup>c</sup>     | 1301±162 <sup>bc</sup>   | 1350±94 <sup>bc</sup>    | 954±138 <sup>abc</sup>    | 1010±47 <sup>abc</sup>    |
| Ligstroside                                               | 957±169 <sup>a</sup>    | 2885±388 <sup>bc</sup>  | 1345±151 <sup>abc</sup>   | 1402±32 <sup>abc</sup>   | 1623±509 <sup>abc</sup>   | 1311±343 <sup>ab</sup>    | 2916±1403 <sup>c</sup>   | 1905±431 <sup>abc</sup>  | 1599±127 <sup>abc</sup>   | 2145±464 <sup>abc</sup>   |
| Lucidumoside C                                            | 242±117 <sup>abc</sup>  | 200±33 <sup>ab</sup>    | 108±54 <sup>a</sup>       | 247±30 <sup>abc</sup>    | 216±74 <sup>ab</sup>      | 246±143 <sup>abc</sup>    | 103±33 <sup>a</sup>      | 357±105 <sup>bc</sup>    | 485±123 <sup>c</sup>      | 147±37 <sup>ab</sup>      |
| Luteolin-7-O-glucoside (isomer 1)                         | 36±16 <sup>a</sup>      | 12±1 <sup>a</sup>       | 51±36 <sup>ab</sup>       | 21±14 <sup>a</sup>       | 97±35 <sup>b</sup>        | 32±0 <sup>a</sup>         | 10±5 <sup>a</sup>        | 5±3 <sup>a</sup>         | 11±2 <sup>a</sup>         | 53±27 <sup>ab</sup>       |
| Luteolin-O-glucoside (isomer 2)                           | 7±2 <sup>a</sup>        | 7±4 <sup>a</sup>        | 40±35 <sup>a</sup>        | 32±8 <sup>a</sup>        | 102±16 <sup>b</sup>       | 2±1 <sup>a</sup>          | 5±2 <sup>a</sup>         | n.d                      | 4±0 <sup>a</sup>          | 20±3 <sup>a</sup>         |
| Luteolin-O-glucoside (isomer 3)                           | 14±6 <sup>ab</sup>      | 8±1 <sup>ab</sup>       | 23±10 <sup>b</sup>        | 8±6 <sup>ab</sup>        | 21±3 <sup>b</sup>         | 11±2 <sup>ab</sup>        | 4±1 <sup>a</sup>         | n.d                      | 9±1 <sup>ab</sup>         | 20±10 <sup>b</sup>        |
| Maslinic acid                                             | 488±69 <sup>ab</sup>    | 1041±121 <sup>bc</sup>  | 984±499 <sup>abc</sup>    | 710±153 <sup>ab</sup>    | 1385±349 <sup>c</sup>     | 680±184 <sup>ab</sup>     | 351±101 <sup>a</sup>     | 497±104 <sup>ab</sup>    | 364±65 <sup>a</sup>       | 772±162 <sup>abc</sup>    |
| Metoxypinoresinol glucoside                               | 137±13 <sup>bc</sup>    | 114±1 <sup>abc</sup>    | 135±7 <sup>bc</sup>       | 89±17 <sup>a</sup>       | 133±28 <sup>bc</sup>      | 130±17 <sup>abc</sup>     | 106±13 <sup>ab</sup>     | 150±8 <sup>c</sup>       | 119±20 <sup>abc</sup>     | 108±4 <sup>abc</sup>      |
| Neonuzhenide/oleuropein glucoside (is 1)                  | 144±53 <sup>ab</sup>    | 239±121 <sup>ab</sup>   | 161±39 <sup>ab</sup>      | 122±29 <sup>ab</sup>     | 210±76 <sup>ab</sup>      | 208±61 <sup>ab</sup>      | 375±205 <sup>b</sup>     | 42±5 <sup>a</sup>        | 230±81 <sup>ab</sup>      | 208±84 <sup>ab</sup>      |
| Neonuzhenide/oleuropein glucoside (is 2)                  | 228±42 <sup>cd</sup>    | 231±24 <sup>cd</sup>    | 93±44 <sup>a</sup>        | 114±21 <sup>ab</sup>     | 310±70 <sup>de</sup>      | 357±21 <sup>e</sup>       | 179±16 <sup>abc</sup>    | 356±29 <sup>a</sup>      | 202±23 <sup>bc</sup>      | 167±16 <sup>abc</sup>     |
| Neonuzhenide/oleuropein glucoside (is 4)                  | 48±10 <sup>a</sup>      | 99±32 <sup>bcd</sup>    | 88±25 <sup>abcd</sup>     | 97±25 <sup>bcd</sup>     | 69±9 <sup>abc</sup>       | 53±5 <sup>ab</sup>        | 128±16 <sup>d</sup>      | 107±4 <sup>cd</sup>      | 40±5 <sup>a</sup>         | 56±8 <sup>ab</sup>        |
| Oleanolic acid                                            | 2438±437 <sup>ab</sup>  | 2790±349 <sup>ab</sup>  | 3775±1693 <sup>b</sup>    | 2709±1003 <sup>ab</sup>  | 1586±674 <sup>a</sup>     | 2713±684 <sup>ab</sup>    | 1064±298 <sup>a</sup>    | 1913±280 <sup>ab</sup>   | 1015±102 <sup>a</sup>     | 2542±561 <sup>ab</sup>    |
| Oleoside/secologanoside (isomer 1)                        | 203±17 <sup>a</sup>     | 402±34 <sup>d</sup>     | 186±37 <sup>a</sup>       | 278±15 <sup>abc</sup>    | 310±28 <sup>bcd</sup>     | 377±28 <sup>cd</sup>      | 277±52 <sup>abc</sup>    | 231±14 <sup>ab</sup>     | 254±59 <sup>ab</sup>      | 260±36 <sup>ab</sup>      |
| Oleoside/secologanoside (isomer 2)                        | 851±57 <sup>ab</sup>    | 1566±100 <sup>cd</sup>  | 855±97 <sup>ab</sup>      | 1121±85 <sup>b</sup>     | 1702±168 <sup>d</sup>     | 1193±138 <sup>bc</sup>    | 1027±203 <sup>ab</sup>   | 623±29 <sup>a</sup>      | 1211±294 <sup>bc</sup>    | 1153±66 <sup>bc</sup>     |
| Oleuropein                                                | 14793±2356 <sup>a</sup> | 34335±2802 <sup>a</sup> | 21077±1819 <sup>abc</sup> | 17190±2044 <sup>ab</sup> | 24208±1113 <sup>bcd</sup> | 26303±1532 <sup>cde</sup> | 17590±5557 <sup>ab</sup> | 30795±2207 <sup>de</sup> | 19813±4649 <sup>abc</sup> | 18180±1040 <sup>abc</sup> |
| Oleuropein aglycone (isomer 1)                            | 27±8 <sup>a</sup>       | 125±36 <sup>a</sup>     | 109±88 <sup>a</sup>       | 56±19 <sup>a</sup>       | 107±27 <sup>a</sup>       | 101±12 <sup>a</sup>       | 68±27 <sup>a</sup>       | 67±14 <sup>a</sup>       | 16±6 <sup>a</sup>         | 36±17 <sup>a</sup>        |
| Oleuropein aglycone (isomer 2)                            | 26±5 <sup>a</sup>       | 161±41 <sup>abc</sup>   | 89±77 <sup>ab</sup>       | 91±9 <sup>ab</sup>       | 172±54 <sup>bc</sup>      | 145±34 <sup>ab</sup>      | 286±108 <sup>c</sup>     | 153±5 <sup>abc</sup>     | 26±16 <sup>a</sup>        | 32±9 <sup>ab</sup>        |
| Oleurosides                                               | 351±21 <sup>ab</sup>    | 884±23 <sup>f</sup>     | 308±57 <sup>ab</sup>      | 528±17 <sup>cd</sup>     | 714±83 <sup>a</sup>       | 430±11 <sup>bc</sup>      | 410±78 <sup>bc</sup>     | 900±48 <sup>f</sup>      | 266±61 <sup>a</sup>       | 583±23 <sup>de</sup>      |
| Phenylethyl primeveroside                                 | 49±7 <sup>d</sup>       | 48±4 <sup>cd</sup>      | 27±11 <sup>ab</sup>       | 42±3 <sup>bcd</sup>      | 27±7 <sup>ab</sup>        | 58±8 <sup>d</sup>         | 23±3 <sup>a</sup>        | 54±7 <sup>d</sup>        | 30±4 <sup>abc</sup>       | 17±2 <sup>a</sup>         |
| Quercetin-O-glucoside (isomer 1)                          | 37±8 <sup>ab</sup>      | 27±2 <sup>ab</sup>      | 45±27 <sup>ab</sup>       | 22±9 <sup>a</sup>        | 142±31 <sup>c</sup>       | 63±6 <sup>b</sup>         | 41±5 <sup>ab</sup>       | 22±2 <sup>a</sup>        | 22±1 <sup>a</sup>         | 31±8 <sup>ab</sup>        |
| Quercetin-O-glucoside (isomer 2)                          | 35±3 <sup>a</sup>       | 17±5 <sup>a</sup>       | 31±24 <sup>a</sup>        | 26±3 <sup>a</sup>        | 96±56 <sup>b</sup>        | 16±5 <sup>a</sup>         | 8±3 <sup>a</sup>         | 9±5 <sup>a</sup>         | 16±3 <sup>a</sup>         | 16±6 <sup>a</sup>         |
| Quercetin-O-glucoside (isomer 3)                          | 39±6 <sup>a</sup>       | 18±4 <sup>a</sup>       | 40±16 <sup>a</sup>        | 32±3 <sup>a</sup>        | 102±37 <sup>b</sup>       | 30±4 <sup>a</sup>         | 30±9 <sup>a</sup>        | 10±4 <sup>a</sup>        | 22±4 <sup>a</sup>         | 30±7 <sup>a</sup>         |
| Quinic acid                                               | 1792±175 <sup>ab</sup>  | 2710±112 <sup>b</sup>   | 2300±831 <sup>ab</sup>    | 2463±471 <sup>ab</sup>   | 2095±380 <sup>ab</sup>    | 1490±103 <sup>a</sup>     | 1761±89 <sup>ab</sup>    | 1844±206 <sup>ab</sup>   | 1469±174 <sup>a</sup>     | 1862±266 <sup>ab</sup>    |
| Rutin                                                     | 91±34 <sup>ab</sup>     | 88±9 <sup>ab</sup>      | 111±68 <sup>ab</sup>      | 34±7 <sup>a</sup>        | 157±33 <sup>b</sup>       | 99±19 <sup>ab</sup>       | 54±6 <sup>a</sup>        | 33±6 <sup>a</sup>        | 47±5 <sup>a</sup>         | 34±8 <sup>a</sup>         |
| Taxifolin                                                 | 186±13 <sup>cde</sup>   | 151±16 <sup>bcd</sup>   | 199±12 <sup>de</sup>      | 31±8 <sup>a</sup>        | 120±26 <sup>bc</sup>      | 228±42 <sup>ef</sup>      | 285±45 <sup>f</sup>      | 145±11 <sup>bcd</sup>    | 118±19 <sup>bc</sup>      | 115±17 <sup>b</sup>       |
| Unknown 1                                                 | 34±5 <sup>a</sup>       | 85±35 <sup>ab</sup>     | 41±35 <sup>a</sup>        | 157±44 <sup>bc</sup>     | 101±64 <sup>ab</sup>      | 251±32 <sup>c</sup>       | 107±19 <sup>ab</sup>     | 111±22 <sup>ab</sup>     | 42±15 <sup>a</sup>        | 60±47 <sup>ab</sup>       |
| Unknown 2                                                 | 260±3 <sup>a</sup>      | 194±20 <sup>a</sup>     | 202±18 <sup>a</sup>       | 257±13 <sup>a</sup>      | 261±61 <sup>a</sup>       | 240±28 <sup>a</sup>       | 188±32 <sup>a</sup>      | 253±16 <sup>a</sup>      | 221±6 <sup>a</sup>        | 249±16 <sup>a</sup>       |
| Unknown 4                                                 | n.d                     | 43±15 <sup>b</sup>      | 184±14 <sup>c</sup>       | n.d                      | n.d                       | n.d                       | 176±37 <sup>c</sup>      | n.d                      | 14±0 <sup>a</sup>         | n.d                       |
| Unknown 5                                                 | 149±31 <sup>ab</sup>    | 139±18 <sup>ab</sup>    | 191±119 <sup>b</sup>      | 104±33 <sup>ab</sup>     | 112±23 <sup>ab</sup>      | 120±43 <sup>ab</sup>      | 106±36 <sup>ab</sup>     | 62±9 <sup>ab</sup>       | 56±11 <sup>a</sup>        | 151±26 <sup>ab</sup>      |
| Verbascoside                                              | 319±89 <sup>a</sup>     | 1196±205 <sup>ab</sup>  | 1118±547 <sup>ab</sup>    | 499±146 <sup>a</sup>     | 883±429 <sup>a</sup>      | 521±165 <sup>a</sup>      | 1941±739 <sup>b</sup>    | 234±58 <sup>a</sup>      | 661±189 <sup>a</sup>      | 508±79 <sup>a</sup>       |

Lower case letters indicate Tukey's post hoc test differences ( $p < 0.05$ ) among different cultivars. Means with a common letter are not significantly different ( $p > 0.05$ ); n.d: not detected

**Table S2.** Quantitative results obtained by LC-IT MS. Data expressed as mg kg<sup>-1</sup> of olive tissue (DW) ± standard deviation (*cont.*).

| <b>c) Roots</b>                                     | <b>Arbequina</b>         | <b>Empeltre</b>         | <b>Frantoio</b>          | <b>Hojiblanca</b>      | <b>Jabali</b>           | <b>Koroneiki</b>         | <b>Leccino</b>           | <b>Mastoidis</b>         | <b>Menya</b>             | <b>Picual</b>          |
|-----------------------------------------------------|--------------------------|-------------------------|--------------------------|------------------------|-------------------------|--------------------------|--------------------------|--------------------------|--------------------------|------------------------|
| <i>11-Hydroxyiridodial glucoside pentaacetate</i>   | 123±50 <sup>ab</sup>     | 278±31 <sup>cd</sup>    | 77±23 <sup>ab</sup>      | 151±13 <sup>abc</sup>  | 131±56 <sup>abc</sup>   | 345±19 <sup>d</sup>      | 188±113 <sup>bc</sup>    | 16±3 <sup>a</sup>        | 156±66 <sup>abc</sup>    | 82±42 <sup>ab</sup>    |
| <i>7-deoxyloganic acid</i>                          | 48±12 <sup>a</sup>       | 16±11 <sup>a</sup>      | 17±15 <sup>a</sup>       | 48±19 <sup>a</sup>     | 81±43 <sup>a</sup>      | 986±688 <sup>c</sup>     | 330±126 <sup>b</sup>     | 58±29 <sup>a</sup>       | 20±12 <sup>a</sup>       | 66±41 <sup>a</sup>     |
| <i>Acetoxypinoresinol</i>                           | 155±57 <sup>b</sup>      | 62±14 <sup>ab</sup>     | 149±46 <sup>b</sup>      | 154±78 <sup>b</sup>    | 147±49 <sup>b</sup>     | 57±22 <sup>ab</sup>      | 17±4 <sup>a</sup>        | 59±9 <sup>ab</sup>       | 141±22 <sup>b</sup>      | 51±12 <sup>ab</sup>    |
| <i>Acetoxypinoresinol glucoside</i>                 | 798±156 <sup>bc</sup>    | 455±116 <sup>ab</sup>   | 819±76 <sup>bc</sup>     | 670±95 <sup>abc</sup>  | 1001±415 <sup>c</sup>   | 618±32 <sup>abc</sup>    | 335±26 <sup>a</sup>      | 657±10 <sup>abc</sup>    | 803±130 <sup>bc</sup>    | 262±87 <sup>a</sup>    |
| <i>Betulinic acid</i>                               | 275±24 <sup>c</sup>      | 269±40 <sup>bc</sup>    | 244±27 <sup>bc</sup>     | 183±13 <sup>abc</sup>  | 112±13 <sup>a</sup>     | 174±67 <sup>ab</sup>     | 179±45 <sup>abc</sup>    | 179±9 <sup>abc</sup>     | 276±36 <sup>c</sup>      | 93±18 <sup>a</sup>     |
| <i>Cycloolivil glucoside (isomer 1)</i>             | 421±79 <sup>cd</sup>     | 450±99 <sup>d</sup>     | 164±15 <sup>a</sup>      | 164±30 <sup>a</sup>    | 211±76 <sup>ab</sup>    | 411±44 <sup>cd</sup>     | 378±90 <sup>bcd</sup>    | 370±33 <sup>bcd</sup>    | 263±60 <sup>abcd</sup>   | 251±100 <sup>abc</sup> |
| <i>Cycloolivil glucoside (isomer 2)</i>             | 190±77 <sup>ab</sup>     | 426±38 <sup>c</sup>     | 354±97 <sup>bc</sup>     | 255±119 <sup>abc</sup> | 117±45 <sup>a</sup>     | 104±7 <sup>a</sup>       | 142±27 <sup>a</sup>      | 258±59 <sup>abc</sup>    | 232±58 <sup>abc</sup>    | 210±71 <sup>ab</sup>   |
| <i>Elenolic acid glucoside (isomer 1)</i>           | 286±91 <sup>abc</sup>    | 767±68 <sup>d</sup>     | 289±98 <sup>abc</sup>    | 172±25 <sup>ab</sup>   | 292±79 <sup>abc</sup>   | 442±75 <sup>bc</sup>     | 547±256 <sup>cd</sup>    | 420±32 <sup>abc</sup>    | 335±82 <sup>abc</sup>    | 128±37 <sup>a</sup>    |
| <i>Elenolic acid glucoside (isomer 2)</i>           | 121±47 <sup>abc</sup>    | 284±31 <sup>d</sup>     | 83±22 <sup>ab</sup>      | 29±8 <sup>a</sup>      | 76±26 <sup>a</sup>      | 302±43 <sup>d</sup>      | 204±98 <sup>bcd</sup>    | 225±35 <sup>cd</sup>     | 118±30 <sup>abc</sup>    | 27±11 <sup>a</sup>     |
| <i>Hydroxy oleuropein</i>                           | 152±36 <sup>a</sup>      | 450±311 <sup>a</sup>    | 246±133 <sup>a</sup>     | 197±90 <sup>a</sup>    | 184±124 <sup>a</sup>    | 248±102 <sup>a</sup>     | 193±28 <sup>a</sup>      | 429±20 <sup>a</sup>      | 372±126 <sup>a</sup>     | 86±8 <sup>a</sup>      |
| <i>Hydroxypinoresinol glucoside</i>                 | 528±48 <sup>bc</sup>     | 472±32 <sup>abc</sup>   | 713±27 <sup>de</sup>     | 545±27 <sup>bc</sup>   | 347±124 <sup>a</sup>    | 738±49 <sup>de</sup>     | 818±52 <sup>e</sup>      | 603±24 <sup>cd</sup>     | 573±56 <sup>bcd</sup>    | 426±66 <sup>ab</sup>   |
| <i>Ligstroside</i>                                  | 1502±234                 | 4061±222                | 1778±268                 | 877±155                | 1961±1026               | 3526±739                 | 3111±1616                | 2542±180                 | 2446±729                 | 914±325                |
| <i>Lucidumoside C</i>                               | 270±89 <sup>ab</sup>     | 1045±823 <sup>b</sup>   | 426±259 <sup>ab</sup>    | 273±146 <sup>ab</sup>  | 313±277 <sup>ab</sup>   | 582±307 <sup>ab</sup>    | 438±92 <sup>ab</sup>     | 868±88 <sup>ab</sup>     | 688±255 <sup>ab</sup>    | 113±12 <sup>a</sup>    |
| <i>Maslinic acid</i>                                | 3082±777 <sup>ab</sup>   | 3000±774 <sup>ab</sup>  | 2181±436 <sup>a</sup>    | 2514±106 <sup>ab</sup> | 2535±465 <sup>ab</sup>  | 2824±692 <sup>ab</sup>   | 3351±601 <sup>ab</sup>   | 2780±842 <sup>ab</sup>   | 3897±391 <sup>b</sup>    | 2497±170 <sup>ab</sup> |
| <i>Metoxypinoresinol glucoside</i>                  | 87±6 <sup>bc</sup>       | 60±12 <sup>ab</sup>     | 101±15 <sup>c</sup>      | 97±13 <sup>c</sup>     | 72±22 <sup>abc</sup>    | 36±1 <sup>a</sup>        | 44±10 <sup>a</sup>       | 83±4 <sup>bc</sup>       | 45±3 <sup>a</sup>        | 89±20 <sup>bc</sup>    |
| <i>Neonuzhenide/oleuropein glucoside (isomer 1)</i> | 101±47 <sup>abc</sup>    | 195±52 <sup>abc</sup>   | 70±19 <sup>ab</sup>      | 26±9 <sup>a</sup>      | 101±49 <sup>abc</sup>   | 339±85 <sup>c</sup>      | 269±230 <sup>bc</sup>    | 113±13 <sup>abc</sup>    | 92±17 <sup>ab</sup>      | 34±13 <sup>ab</sup>    |
| <i>Neonuzhenide/oleuropein glucoside (isomer 2)</i> | 90±35 <sup>ab</sup>      | 156±12 <sup>bc</sup>    | 70±30 <sup>ab</sup>      | 31±9 <sup>a</sup>      | 138±59 <sup>ab</sup>    | 394±57 <sup>d</sup>      | 170±55 <sup>bc</sup>     | 260±36 <sup>c</sup>      | 117±19 <sup>ab</sup>     | 42±9 <sup>a</sup>      |
| <i>Neonuzhenide/oleuropein glucoside (isomer 4)</i> | 15±2 <sup>a</sup>        | 35±1 <sup>cd</sup>      | 16±2 <sup>ab</sup>       | 7±1 <sup>a</sup>       | 13±4 <sup>a</sup>       | 39±5 <sup>d</sup>        | 26±5 <sup>bc</sup>       | 34±5 <sup>cd</sup>       | 16±3 <sup>ab</sup>       | 8±3 <sup>a</sup>       |
| <i>Oleanolic acid</i>                               | 53±11 <sup>a</sup>       | 43±11 <sup>a</sup>      | 45±4 <sup>a</sup>        | 38±4 <sup>a</sup>      | 30±6 <sup>a</sup>       | 43±10 <sup>a</sup>       | 49±15 <sup>a</sup>       | 38±6 <sup>a</sup>        | 36±5 <sup>a</sup>        | 34±4 <sup>a</sup>      |
| <i>Oleoside/secologanoside (isomer 1)</i>           | 69±15 <sup>ab</sup>      | 204±15 <sup>e</sup>     | 61±12 <sup>a</sup>       | 64±13 <sup>a</sup>     | 70±13 <sup>abc</sup>    | 147±26 <sup>de</sup>     | 130±50 <sup>cd</sup>     | 125±7 <sup>bcd</sup>     | 57±9 <sup>a</sup>        | 38±5 <sup>a</sup>      |
| <i>Oleoside/secologanoside (isomer 2)</i>           | 267±44 <sup>abc</sup>    | 323±60 <sup>bc</sup>    | 244±24 <sup>abc</sup>    | 366±99 <sup>c</sup>    | 388±98 <sup>c</sup>     | 164±37 <sup>ab</sup>     | 300±24 <sup>abc</sup>    | 165±7 <sup>ab</sup>      | 139±29 <sup>a</sup>      | 227±70 <sup>abc</sup>  |
| <i>Oleuropein</i>                                   | 17093±6267 <sup>ab</sup> | 37381±5024 <sup>d</sup> | 13510±1354 <sup>ab</sup> | 6736±898 <sup>a</sup>  | 11165±4890 <sup>a</sup> | 33302±2467 <sup>cd</sup> | 24029±8228 <sup>bc</sup> | 33049±1922 <sup>cd</sup> | 13790±4379 <sup>ab</sup> | 6545±2577 <sup>a</sup> |
| <i>Quinic acid</i>                                  | 252±14 <sup>a</sup>      | 295±50 <sup>a</sup>     | 356±239 <sup>a</sup>     | 383±65 <sup>a</sup>    | 377±73 <sup>a</sup>     | 245±85 <sup>a</sup>      | 288±36 <sup>a</sup>      | 239±5 <sup>a</sup>       | 370±125 <sup>a</sup>     | 311±87 <sup>a</sup>    |
| <i>Unknown 1</i>                                    | 133±63 <sup>ab</sup>     | 266±77 <sup>bcd</sup>   | 124±68 <sup>ab</sup>     | 81±23 <sup>a</sup>     | 203±89 <sup>abc</sup>   | 423±84 <sup>d</sup>      | 241±68 <sup>abc</sup>    | 341±11 <sup>cd</sup>     | 94±31 <sup>ab</sup>      | 66±36 <sup>a</sup>     |
| <i>Unknown 2</i>                                    | 141±25 <sup>ab</sup>     | 162±17 <sup>b</sup>     | 135±7 <sup>ab</sup>      | 123±20 <sup>ab</sup>   | 103±26 <sup>a</sup>     | 103±16 <sup>a</sup>      | 117±9 <sup>ab</sup>      | 142±14 <sup>ab</sup>     | 144±3 <sup>ab</sup>      | 116±29 <sup>ab</sup>   |
| <i>Unknown 3</i>                                    | 57±38 <sup>ab</sup>      | 185±21 <sup>c</sup>     | 33±14 <sup>a</sup>       | 18±2 <sup>a</sup>      | 38±8 <sup>ab</sup>      | 131±31 <sup>bc</sup>     | 108±55 <sup>abc</sup>    | 185±63 <sup>c</sup>      | 40±10 <sup>ab</sup>      | 16±8 <sup>a</sup>      |
| <i>Verbascoside</i>                                 | 6055±1827 <sup>a</sup>   | 2778±715 <sup>a</sup>   | 5655±643 <sup>a</sup>    | 9359±5461 <sup>a</sup> | 8883±4473 <sup>a</sup>  | 8887±2296 <sup>a</sup>   | 9913±1546 <sup>a</sup>   | 4799±1477 <sup>a</sup>   | 4990±783 <sup>a</sup>    | 8695±3120 <sup>a</sup> |
| <i>Isoverbascoside</i>                              | 693±89 <sup>ab</sup>     | 366±79 <sup>a</sup>     | 1185±72 <sup>ab</sup>    | 1237±716 <sup>ab</sup> | 1150±306 <sup>ab</sup>  | 711±19 <sup>ab</sup>     | 924±68 <sup>ab</sup>     | 760±52 <sup>ab</sup>     | 724±157 <sup>ab</sup>    | 1442±681 <sup>b</sup>  |

Lower case letters indicate Tukey's post hoc test differences ( $p < 0.05$ ) among different cultivars. Means with a common letter are not significantly different ( $p > 0.05$ ).

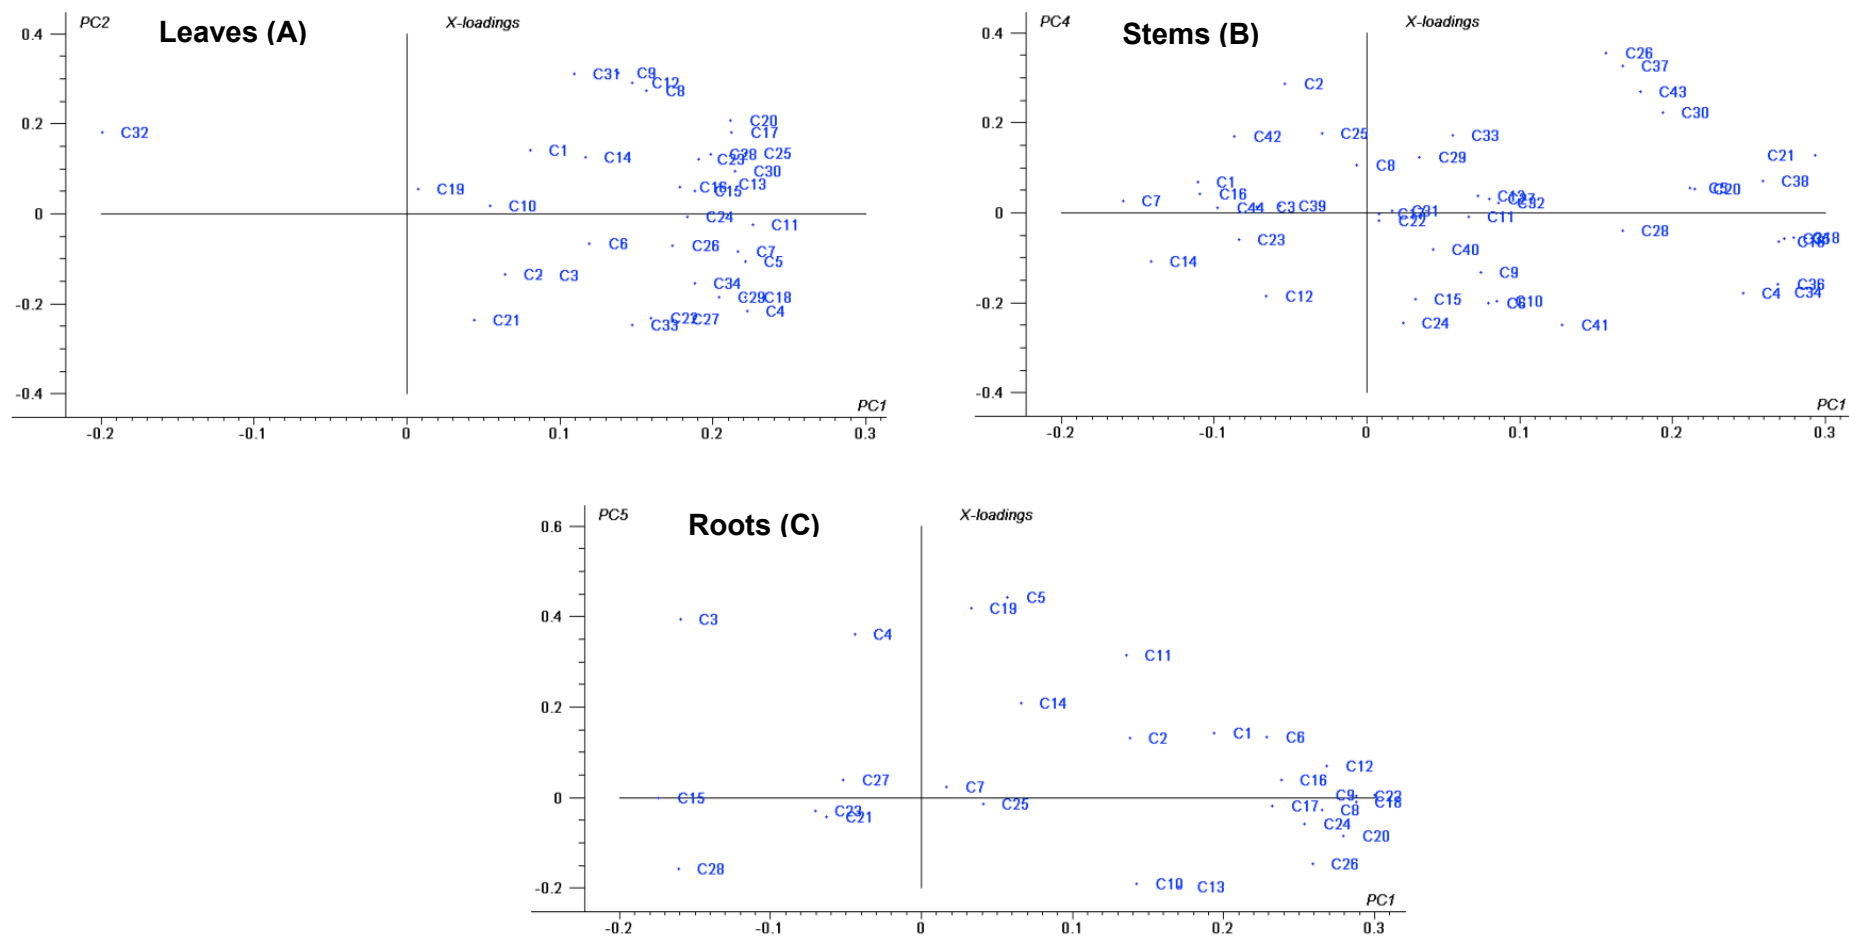

**Figure S1.** Principal component analysis (PCA) loadings plots representing the two principal components (PCs) providing the best samples' grouping for each olive tissue: leaves (A), stems (B) and roots (C). \*Compound numbers at the end of the document.

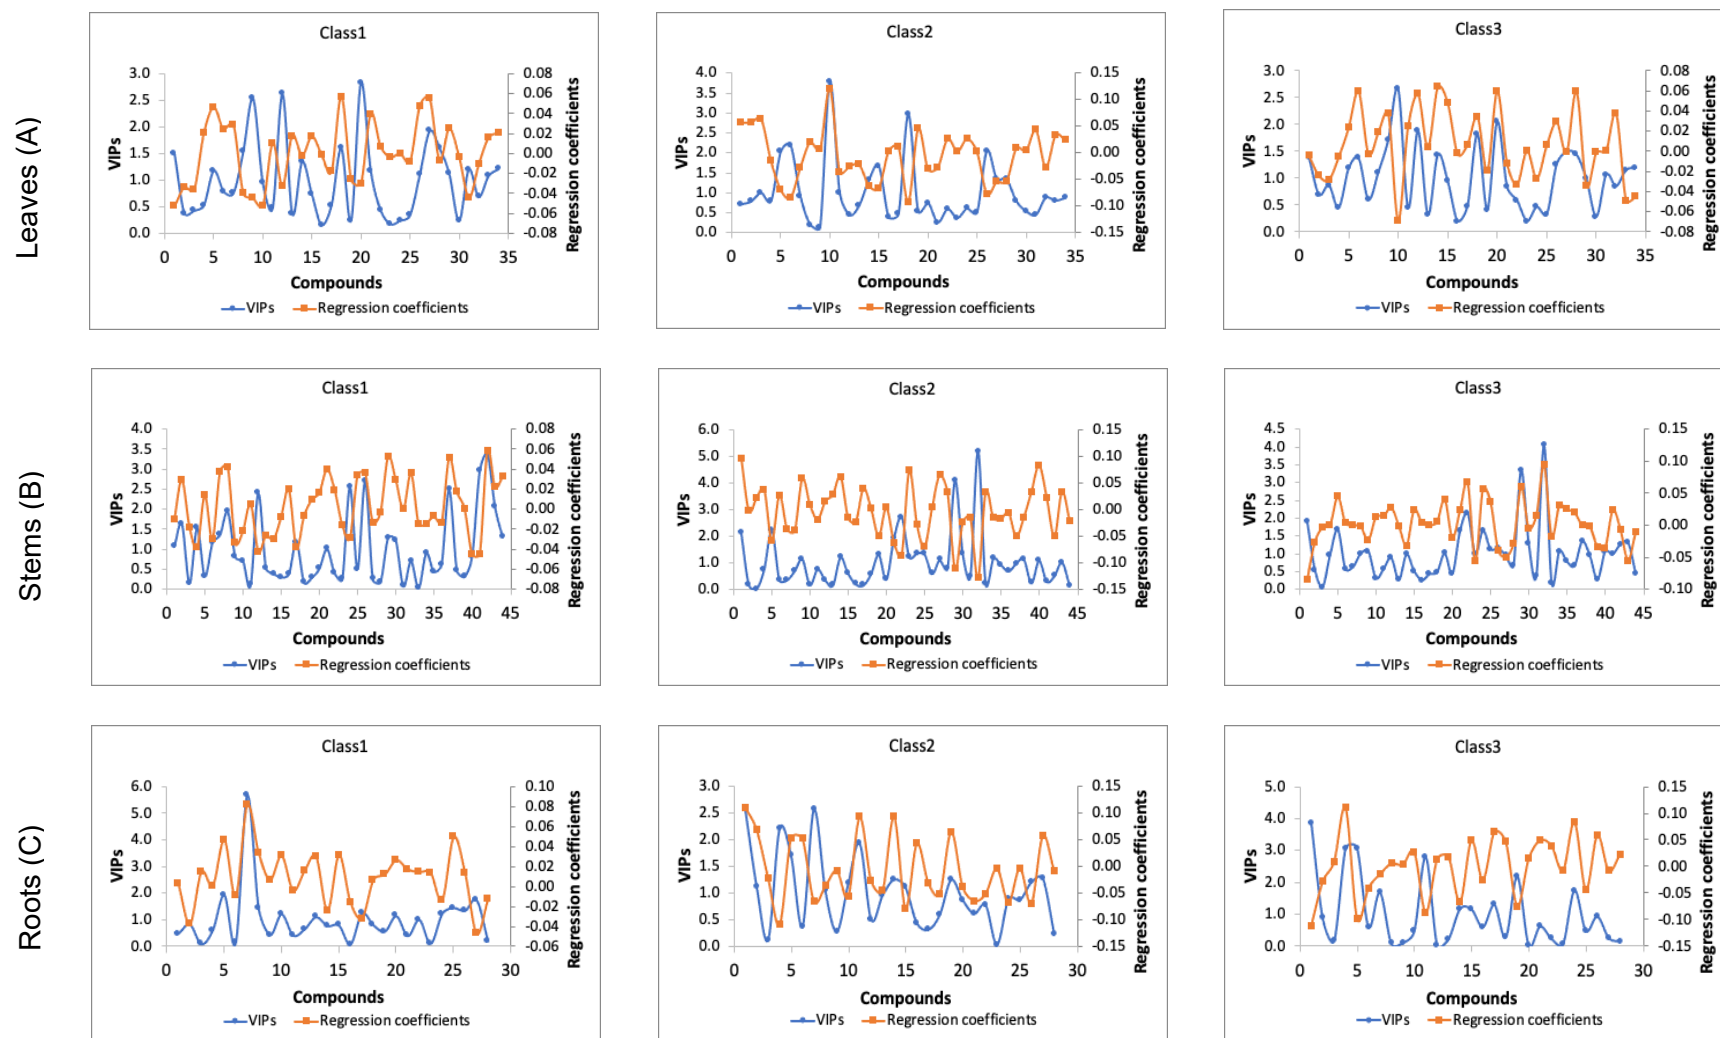

**Figure S2.** Representation of the regression coefficients and variable importance on the projection (VIP) values of each metabolite quantified in the three olive tissues under study: leaves (A), stems (B) and roots (C). Class 1: high resistant cultivars; class 2: resistant, moderately susceptible, and susceptible cultivars; class 3: extremely susceptible cultivars. \*Compound numbers at the end of the document.



**\*Compound numbers in Figure S1 and S2.**

| LEAVES |                                                           | STEMS |                                                           | ROOTS |                                              |
|--------|-----------------------------------------------------------|-------|-----------------------------------------------------------|-------|----------------------------------------------|
| Code   | Compound name (leaves)                                    | Code  | Compound name                                             | Code  | Compound name                                |
| C1     | Aldehydic form of decarboxymethyl elenolic acid glucoside | C1    | 11-Hydroxyiridodial glucoside pentaacetate                | C1    | 11-Hydroxyiridodial glucoside pentaacetate   |
| C2     | Apigenin 7-O-glucoside                                    | C2    | Acetoxypinoresinol                                        | C2    | 7-deoxyloganic acid                          |
| C3     | Apigenin O-rutinoside                                     | C3    | Acetoxypinoresinol glucoside                              | C3    | Acetoxypinoresinol                           |
| C4     | Betulinic acid                                            | C4    | Aldehydic form of decarboxymethyl elenolic acid glucoside | C4    | Acetoxypinoresinol glucoside                 |
| C5     | Chrysoeriol O-glucoside                                   | C5    | Betulinic acid                                            | C5    | Betulinic acid                               |
| C6     | Demethyl oleuropein                                       | C6    | Cyanidin O-glucoside                                      | C6    | Cycloolivil glucoside (isomer 1)             |
| C7     | Diosmin                                                   | C7    | Cycloolivil                                               | C7    | Cycloolivil glucoside (isomer 2)             |
| C8     | Elenolic acid glucoside (isomer 1)                        | C8    | Demethyl oleuropein                                       | C8    | Elenolic acid glucoside (isomer 1)           |
| C9     | Elenolic acid glucoside (isomer 2)                        | C9    | Dihydrokaempferol                                         | C9    | Elenolic acid glucoside (isomer 2)           |
| C10    | Gallocatechin                                             | C10   | Dihydroquercetin 3-O-glucoside                            | C10   | Hydroxy oleuropein                           |
| C11    | Hydroxytyrosol                                            | C11   | Elenolic acid glucoside (isomer 1)                        | C11   | Hydroxypinoresinol glucoside                 |
| C12    | Hydroxytyrosol glucoside                                  | C12   | Elenolic acid glucoside (isomer 2)                        | C12   | Ligstroside                                  |
| C13    | Ligstroside                                               | C13   | Hydroxy oleuropein                                        | C13   | Lucidumoside C                               |
| C14    | Lucidumoside C                                            | C14   | Hydroxypinoresinol glucoside                              | C14   | Maslinic acid                                |
| C15    | Luteolin 7-O-glucoside (isomer 1)                         | C15   | Hydroxytyrosol glucoside                                  | C15   | Metoxypinoresinol glucoside                  |
| C16    | Luteolin O-glucoside (isomer 2)                           | C16   | Ligstroside                                               | C16   | Neonuzhenide/oleuropein glucoside (isomer 1) |
| C17    | Luteolin O-glucoside (isomer 3)                           | C17   | Lucidumoside C                                            | C17   | Neonuzhenide/oleuropein glucoside (isomer 2) |
| C18    | Maslinic acid                                             | C18   | Luteolin 7-O-glucoside (isomer 1)                         | C18   | Neonuzhenide/oleuropein glucoside (isomer 4) |
| C19    | Neonuzhenide/oleuropein glucoside (isomer 1)              | C19   | Luteolin O-glucoside (isomer 2)                           | C19   | Oleanolic acid                               |
| C20    | Neonuzhenide/oleuropein glucoside (isomer 3)              | C20   | Luteolin O-glucoside (isomer 3)                           | C20   | Oleoside                                     |
| C21    | Neonuzhenide/oleuropein glucoside (isomer 4)              | C21   | Maslinic acid                                             | C21   | Secologanoside                               |
| C22    | Oleanolic acid                                            | C22   | Metoxypinoresinol glucoside                               | C22   | Oleuropein                                   |
| C23    | Oleoside                                                  | C23   | Neonuzhenide/oleuropein glucoside (isomer 1)              | C23   | Quinic acid                                  |
| C24    | Secologanoside                                            | C24   | Neonuzhenide/oleuropein glucoside (isomer 2)              | C24   | Unknown 1                                    |
| C25    | Oleuropein                                                | C25   | Neonuzhenide/oleuropein glucoside (isomer 4)              | C25   | Unknown 2                                    |
| C26    | Oleuropein aglycone (isomer 1)                            | C26   | Oleanolic acid                                            | C26   | Unknown 3                                    |
| C27    | Oleuropein aglycone (isomer 2)                            | C27   | Oleoside                                                  | C27   | Verbascoside                                 |
| C28    | Oleuroside                                                | C28   | Secologanoside                                            | C28   | Isoverbascoside                              |
| C29    | Quinic acid                                               | C29   | Oleuropein                                                |       |                                              |
| C30    | Rutin                                                     | C30   | Oleuropein aglycone (isomer 1)                            |       |                                              |
| C31    | Unknown 1                                                 | C31   | Oleuropein aglycone (isomer 2)                            |       |                                              |
| C32    | Unknown 2                                                 | C32   | Oleuroside                                                |       |                                              |
| C33    | Unknown 5                                                 | C33   | Phenylethyl primeveroside                                 |       |                                              |
| C34    | Verbascoside                                              | C34   | Quercetin O-glucoside (isomer 1)                          |       |                                              |
|        |                                                           | C35   | Quercetin O-glucoside (isomer 2)                          |       |                                              |
|        |                                                           | C36   | Quercetin O-glucoside (isomer 3)                          |       |                                              |
|        |                                                           | C37   | Quinic acid                                               |       |                                              |
|        |                                                           | C38   | Rutin                                                     |       |                                              |
|        |                                                           | C39   | Taxifolin                                                 |       |                                              |
|        |                                                           | C40   | Unknown 1                                                 |       |                                              |
|        |                                                           | C41   | Unknown 2                                                 |       |                                              |
|        |                                                           | C42   | Unknown 4                                                 |       |                                              |
|        |                                                           | C43   | Unknown 5                                                 |       |                                              |
|        |                                                           | C44   | Verbascoside                                              |       |                                              |
